# Supplementary material for: Circulating Citrate Is Associated with Liver Fibrosis in Nonalcoholic Fatty Liver Disease and Nonalcoholic Steatohepatitis
Source: MDPI journal article supplement (doi:10.3390/ijms241713332), 2023-08-28
Supplement: s1 [file s1]

**Supplemental Table S1.** Association of higher citrate with liver fibrosis stages in the NAFLD cohort (n=187).

| Regression Models                              |                    | Number of subjects (% of total) | Odds Ratio (95% CI) | <i>p</i> -value |
|------------------------------------------------|--------------------|---------------------------------|---------------------|-----------------|
| Overall ordinal logistic regression analysis** |                    |                                 | 1.41 (1.03 – 1.93)  | 0.03            |
| Intermediate logistic regression analysis*     | F0 vs. F1/F2/F3/F4 | F1/F2/F3/F4: 138 (70.1)         | 1.75 (1.11 – 2.77)  | 0.02            |
|                                                | F0/F1 vs. F2/F3/F4 | F2/F3/F4: 95 (48.2)             | 1.47 (1.01 – 2.12)  | 0.04            |
|                                                | F0/F1/F2 vs. F3/F4 | F3/F4: 34 (18.4)                | 1.23 (0.80 – 1.90)  | 0.35            |
|                                                | F0/F1/F2/F3 vs. F4 | F4: 15 (7.4)                    | 1.15 (0.61 – 2.18)  | 0.66            |

\*Multivariable models adjusted for age, gender, metabolic syndrome, and NAFLD Activity Score (NAS) (effect estimate of adjusted variables will be shared upon request). †z-score for the citrate level was used in the multivariable ordinal and logistic regression models. **Abbreviations:** CI, confidence interval; NAFLD, nonalcoholic fatty liver disease.

**Supplemental Table S2.** Association between pyruvate levels and liver fibrosis in the NAFLD cohort (n=187).

| Variable              | Model 1 (age, sex)            |                 | Model 2 (age, sex and metabolic syndrome) |                 | Model 3 (age, sex, metabolic syndrome and NAS) |                 |
|-----------------------|-------------------------------|-----------------|-------------------------------------------|-----------------|------------------------------------------------|-----------------|
|                       | $\beta$ -coefficient (95% CI) | <i>p</i> -value | $\beta$ -coefficient (95% CI)             | <i>p</i> -value | $\beta$ -coefficient (95% CI)                  | <i>p</i> -value |
| Pyruvate <sup>†</sup> | 0.16 (-0.002 – 0.35)          | 0.05            | 0.12 (-0.05 – 0.30)                       | 0.17            | 0.06 (-0.10 – 0.22)                            | 0.45            |
| Age                   | 0.02 (0.01 – 0.03)            | 0.004           | 0.01 (-0.004 – 0.02)                      | 0.16            | 0.02 (0.004 – 0.03)                            | 0.01            |
| Female                | -0.30 (-0.66 – 0.07)          | 0.11            | -0.32 (-0.68 – 0.05)                      | 0.09            | -0.46 (-0.79 – -0.14)                          | 0.006           |
| Metabolic syndrome    |                               |                 | 0.85 (0.47 – 1.22)                        | <0.001          | 0.70 (0.35 – 1.04)                             | <0.001          |
| NAS                   |                               |                 |                                           |                 | 0.36 (0.25 – 0.47)                             | <0.001          |

<sup>†</sup>z-score for the serum pyruvate level and overall liver fibrosis (F0-F4) as a continuous variable were used in the multivariable regression models.

**Abbreviations:** NAS, non-alcoholic fatty liver disease activity score. **Abbreviations:** CI, confidence interval; NAFLD, nonalcoholic fatty liver disease; NAS, NAFLD activity score.

**Supplemental Table S3.** Association between total ketone body levels and liver fibrosis in the NAFLD cohort (n=187).

| Variable                   | Model 1 (age, sex)            |                 | Model 2 (age, sex and metabolic syndrome) |                 | Model 3 (age, sex, metabolic syndrome and NAS) |                 |
|----------------------------|-------------------------------|-----------------|-------------------------------------------|-----------------|------------------------------------------------|-----------------|
|                            | $\beta$ -coefficient (95% CI) | <i>p</i> -value | $\beta$ -coefficient (95% CI)             | <i>p</i> -value | $\beta$ -coefficient (95% CI)                  | <i>p</i> -value |
| Ketone bodies <sup>†</sup> | 0.09 (-0.09 – 0.26)           | 0.32            | 0.09 (-0.07 – 0.26)                       | 0.28            | 0.14 (-0.005 – 0.29)                           | 0.057           |
| Age                        | 0.02 (0.01 – 0.04)            | 0.002           | 0.01 (-0.004 – 0.02)                      | 0.17            | 0.02 (0.005 – 0.03)                            | 0.008           |
| Female                     | -0.26 (-0.62 – 0.11)          | 0.16            | -0.30 (-0.66 – 0.06)                      | 0.10            | -0.49 (-0.81 – 0.17)                           | 0.003           |
| Metabolic syndrome         |                               |                 | 0.90 (0.52 – 1.27)                        | <0.001          | 0.72 (0.39 – 1.06)                             | <0.001          |
| NAS                        |                               |                 |                                           |                 | 0.39 (0.28 – 0.50)                             | <0.001          |

<sup>†</sup>z-score for the total ketone body level and overall liver fibrosis (F0-F4) as a continuous variable were used in the multivariable regression models.

**Abbreviations:** NAS, non-alcoholic fatty liver disease activity score. **Abbreviations:** CI, confidence interval; NAFLD, nonalcoholic fatty liver disease; NAS, NAFLD activity score.
